# Supplementary material for: Lactate supports a metabolic-epigenetic link in macrophage polarization
Source: PubMed Central journal article supplement — Sci Adv. 2021 Nov 12;7(46):eabi8602. doi: 10.1126/sciadv.abi8602 (PMC8589316; doi:10.1126/sciadv.abi8602), 2021-11-12
Supplement: sciadv.abi8602_sm.pdf [file sciadv.abi8602_sm.pdf]

## Supplementary Materials for

### **Lactate supports a metabolic-epigenetic link in macrophage polarization**

Jordan T. Noe, Beatriz E. Rendon, Anne E. Geller, Lindsey R. Conroy,  
Samantha M. Morrissey, Lyndsay E.A. Young, Ronald C. Bruntz, Eun J. Kim,  
Ashley Wise-Mitchell, Mariana Barbosa de Souza Rizzo, Eric R. Relich, Becca V. Baby,  
Lance A. Johnson, Hayley C. Affronti, Kelly M. McMasters, Brian F. Clem, Matthew S. Gentry,  
Jun Yan, Kathryn E. Wellen, Ramon C. Sun\*, Robert A. Mitchell\*

\*Corresponding author. Email: robert.mitchell@louisville.edu (R.A.M.); ramon.sun@uky.edu (R.C.S.)

Published 12 November 2021, *Sci. Adv.* 7, eabi8602 (2021)  
DOI: 10.1126/sciadv.abi8602

#### **This PDF file includes:**

Figs. S1 to S4

**A**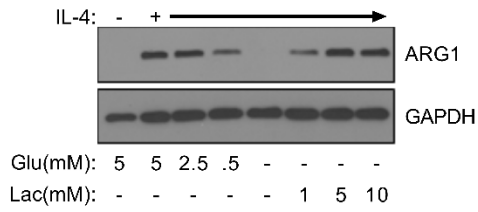**B**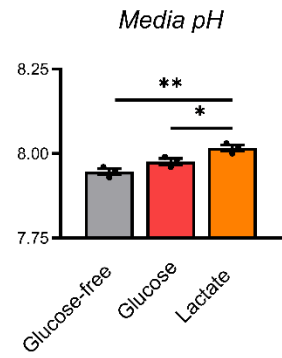**C**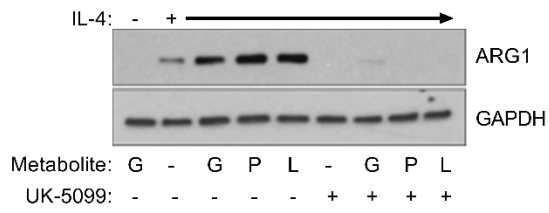**D**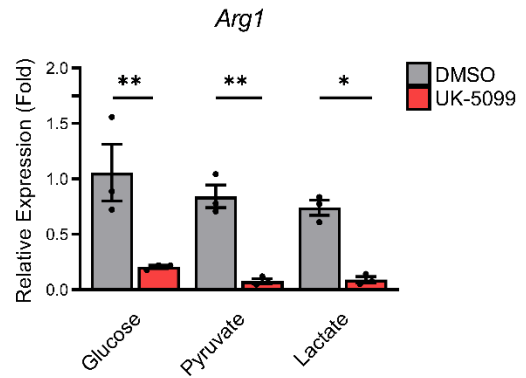**E**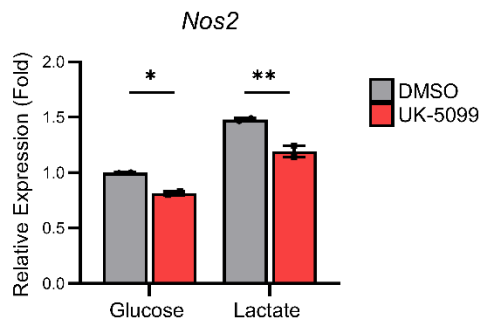**F**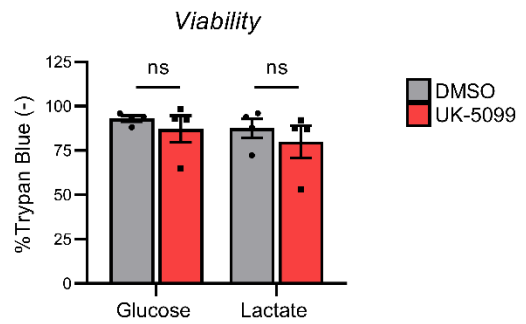**G**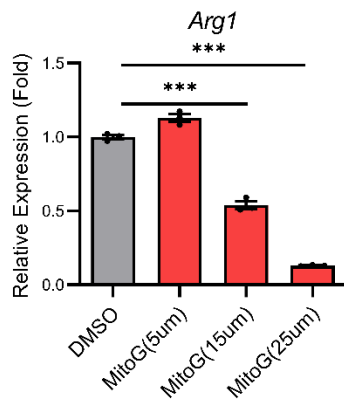**H**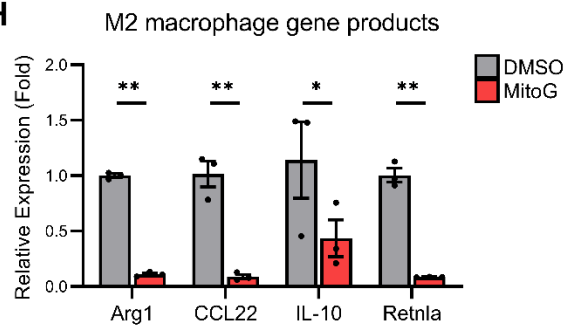

**Fig. S1: Mitochondrial pyruvate metabolism is required for maximal M2 macrophage polarization.** (A) *Arg1* expression of BMDMs starved in GF media + 10% dFBS (4 hours) before supplementation with glucose or lactate (as indicated), and then polarization with IL-4 (20 ng/mL) for forty-eight hours. (B) pH of glucose-free RPMI that was supplemented with or without glucose (5 mM) or sodium lactate (10 mM) (C) Immunoblot of ARG1 expression of BMDMs starved in GF media + 10% dFBS (4 hours) and then pre-treated with UK-5099 (25  $\mu$ M) before supplementation with glucose (G; 5 mM), pyruvate (P; 10 mM) or lactate (L; 10 mM), and then polarization with IL-4 (20 ng/mL) for forty-eight hours. (D) qPCR analysis of *Arg1* expression of BMDMs starved in GF media + 10% dFBS (4 hours) and then pre-treated with UK-5099 (25  $\mu$ M) before supplementation with glucose (5 mM), pyruvate (10 mM), or lactate (10 mM) and then polarization with IL-4 (20 ng/mL) for forty-eight hours. (E) *Nos2* expression of BMDMs starved in GF media + 10% dFBS (4 hours) and then pre-treated with UK-5099 (25  $\mu$ M) before supplementation with glucose (5 mM) or lactate (10 mM) and then polarization with LPS/IFN- $\gamma$  for twenty-four hours. (F) Trypan blue exclusion analysis of BMDMs starved in GF media + 10% dFBS (4 hours) and then pre-treated with UK-5099 (25  $\mu$ M) before supplementation with glucose (5 mM) or lactate (10 mM) and then polarization with IL-4 (20 ng/mL) for twenty-four hours. (G) qPCR expression of *Arg1* of BMDMs starved in GF media + 10% dFBS (4 hours) and then pre-treated with increasing concentrations of Mitoglitazone (MitoG) and then polarized with IL-4 (20 ng/mL) for forty-eight hours. (H) qPCR expression of M2 gene products of BMDMs starved in GF media + 10% dFBS (4 hours) and then pre-treated with Mitoglitazone (MitoG; 25  $\mu$ M) and then polarized with IL-4 (20 ng/mL) for forty-eight hours. Data are shown as mean  $\pm$  SEM and are representative of at least 3 independent experiments. \* $p \leq 0.05$ , \*\* $p \leq 0.01$ , \*\*\* $p \leq 0.001$  by two-way ANOVA (D-H) or one-way ANOVA (B) with Tukey's post-test. Immunoblots are representative of three replicates.

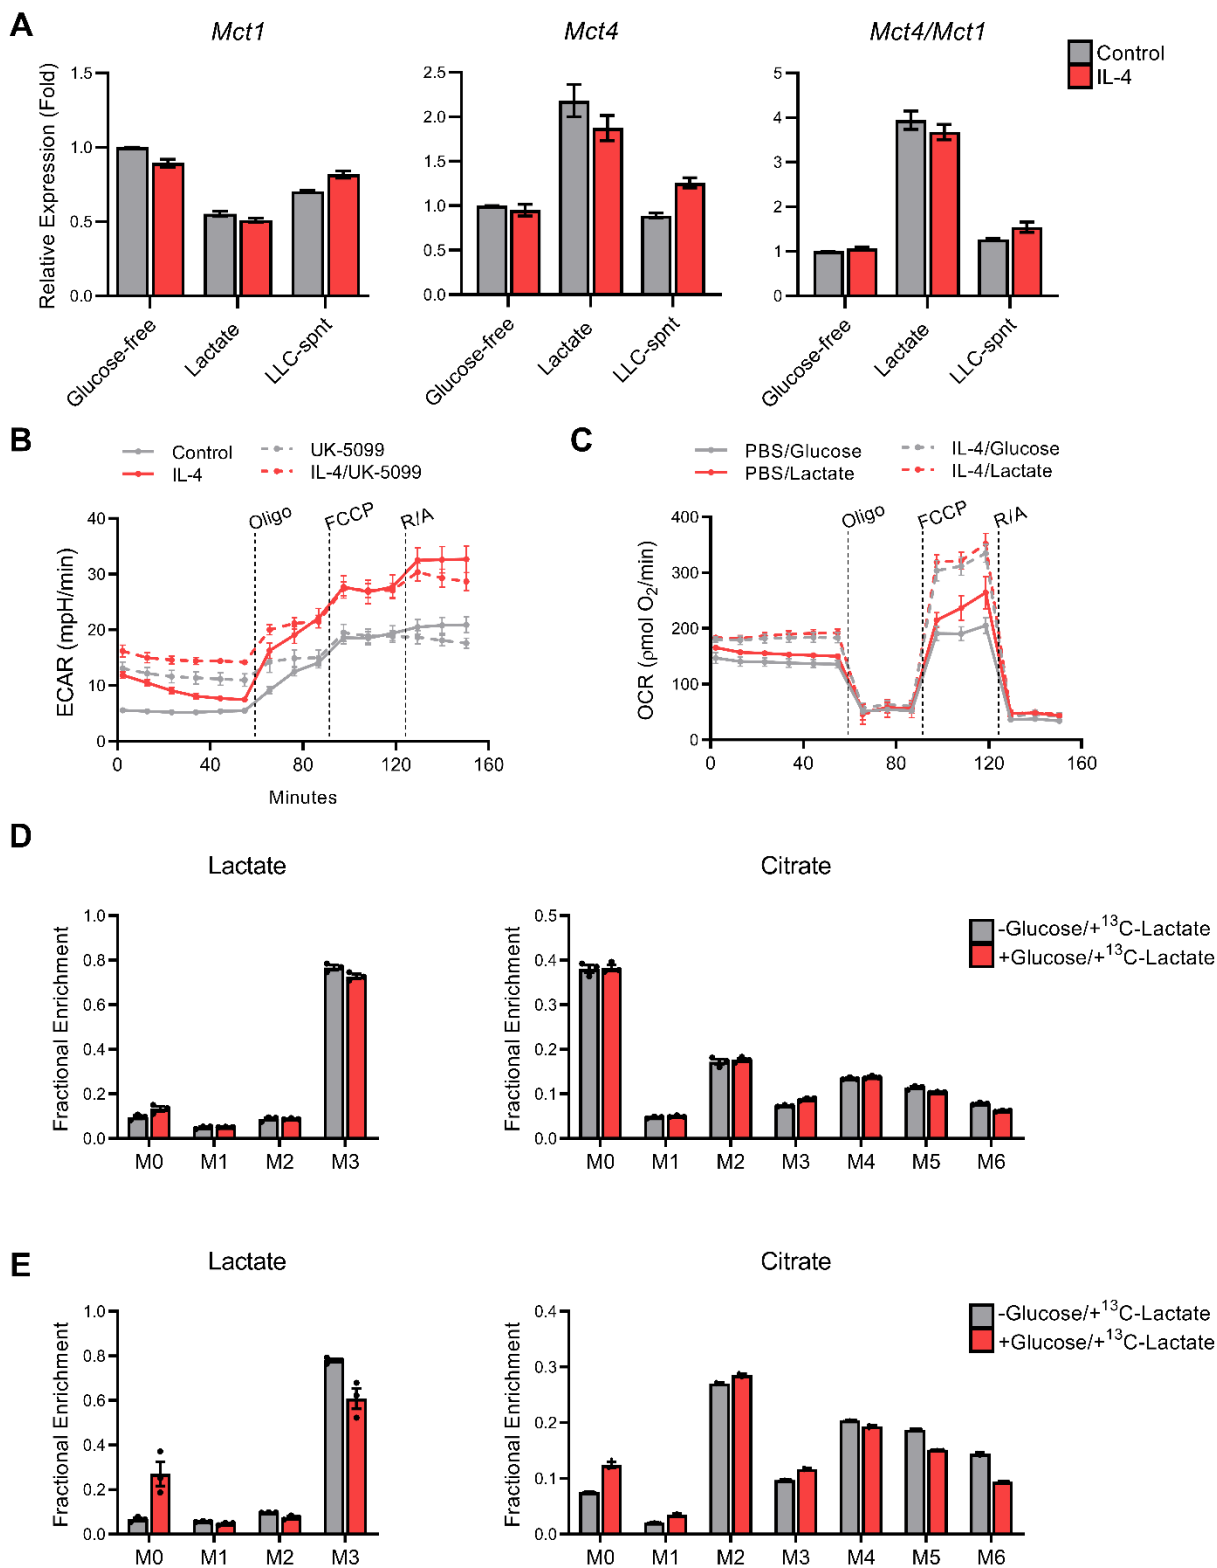

**Fig. S2: Metabolic analyses of IL-4 induced M2 polarized macrophages (A)** qPCR analysis of *Mct1* and *Mct4* expression of BMDMs starved in GF media + 10% dFBS (4 hours) before

supplementation with lactate (10 mM) or LLC cell-conditioned supernatants (LLC-spnt) and then polarization  $\pm$  IL-4 (20 ng/mL) for forty-eight hours. **(B)** Trace of extracellular acidification rate (ECAR) of BMDMs pre-treated  $\pm$  UK-5099 (25  $\mu$ M) and then polarized with IL-4 (20 ng/mL) or vehicle control (PBS) for twenty-four hours before extracellular flux analysis with oligomycin (oligo), FCCP, and rotenone plus antimycin A (Rot/Ant). **(C)** Trace of oxygen consumption rate (OCR) of BMDMs supplemented with glucose (5 mM) or lactate (10 mM) and then polarized with IL-4 (20 ng/mL) or vehicle control (PBS) for twenty-four hours before extracellular flux analysis with oligomycin (oligo), FCCP, and rotenone plus antimycin A (Rot/Ant). Fractional enrichment of lactate **(left)** and citrate **(right)** in BMDMs starved in GF media + 10% dFBS (4 hours) before supplementation with  $^{13}\text{C}$ -lactate (10 mM) in the presence or absence of unlabeled  $^{12}\text{C}$ -glucose, and then polarization with IL-4 (20 ng/mL) for **(D)** three or **(E)** six hours. Data are shown as mean  $\pm$  SEM of five (B, C) or three (A, D, E) replicates.

**A**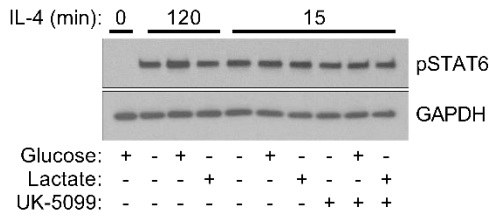**B**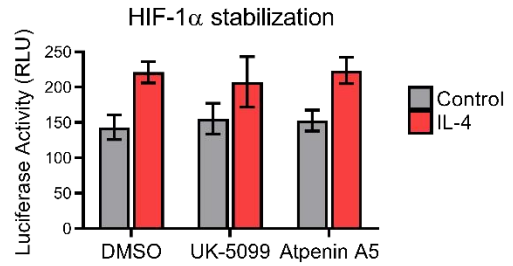**C**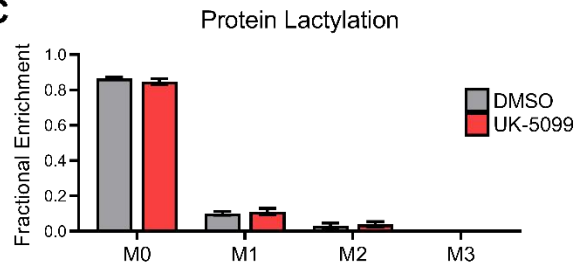**D**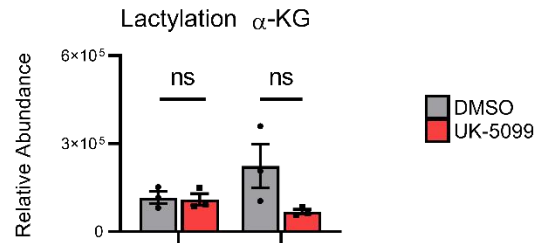**E**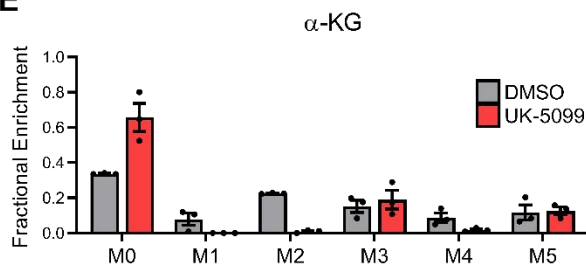**F**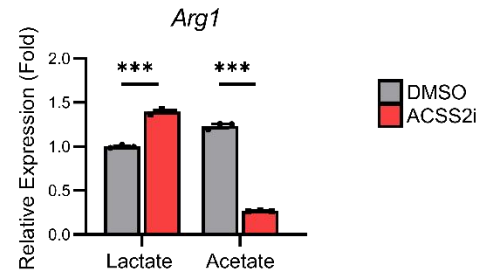**G**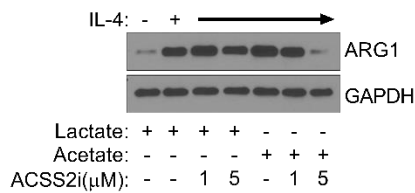**H**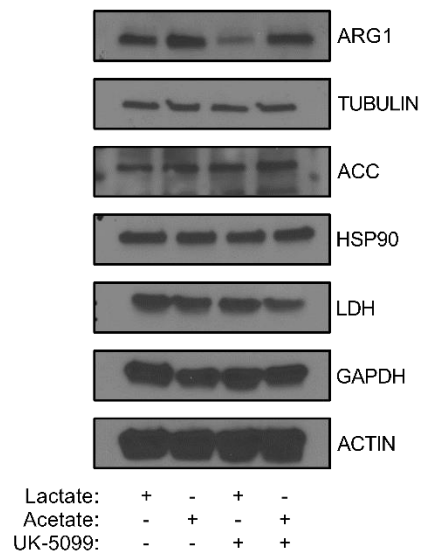**I**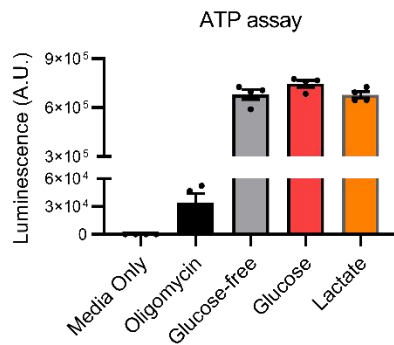

**Fig. S3: Lactate supports IL-4 induced M2 polarization independent of STAT6 phosphorylation, HIF-1 $\alpha$  stabilization, protein lactylation,  $\alpha$ -ketoglutarate production, and bioenergetic metabolism.** (A) Immunoblotting analysis of phosphorylated STAT6 (pSTAT6) of BMDMs starved in GF media + 10% dFBS (4 hours) before pre-treatment with UK-5099 (25  $\mu$ M) and supplementation with glucose (5 mM) or lactate (10 mM) and then polarization  $\pm$  IL-4 (20 ng/mL) for fifteen or one hundred twenty minutes. (B) Luciferase assay of ODD-Luc BMDMs treated UK-5099 (25  $\mu$ M) or Atpenin A5 (25  $\mu$ M) before polarization  $\pm$  IL-4 (20 ng/mL) for twenty-four hours. (C-E) Relative abundance and fractional enrichment of protein lactylation and alpha-ketoglutarate ( $\alpha$ -KG) in BMDMs starved in GF media + 10% dFBS (4 hours) before pre-treatment with UK-5099 (25  $\mu$ M), supplementation with  $^{13}$ C-lactate (10 mM), and then polarization with IL-4 (20 ng/mL) for six hours. (F, G) Arg1 expression in BMDMs starved in GF media + 10% dFBS (4 hours) before pre-treatment with ACSS2i, supplementation with lactate (10 mM) or acetate (10 mM) and then polarization with IL-4 (20 ng/mL) for twenty-four hours. (H) Immunoblotting analysis of “house-keeping” gene products of BMDMs starved in GF media + 10% dFBS (4 hours) before pre-treatment with UK-5099 (25  $\mu$ M) and supplementation with lactate (10 mM) or acetate (10 mM) and then polarization  $\pm$  IL-4 (20 ng/mL) for twenty-four hours. (I) ATP assay of BMDMs starved in GF media + 10% dFBS (4 hours) before pre-treatment  $\pm$  Oligomycin A (Oligo; 10 nM) and supplementation with glucose (5 mM) or lactate (10 mM) and then polarization  $\pm$  IL-4 (20 ng/mL) for twenty-four hours. Data are shown as mean  $\pm$  SEM of two (B), three (C-F), or four (I) replicates. Immunoblots are representative of three replicates.

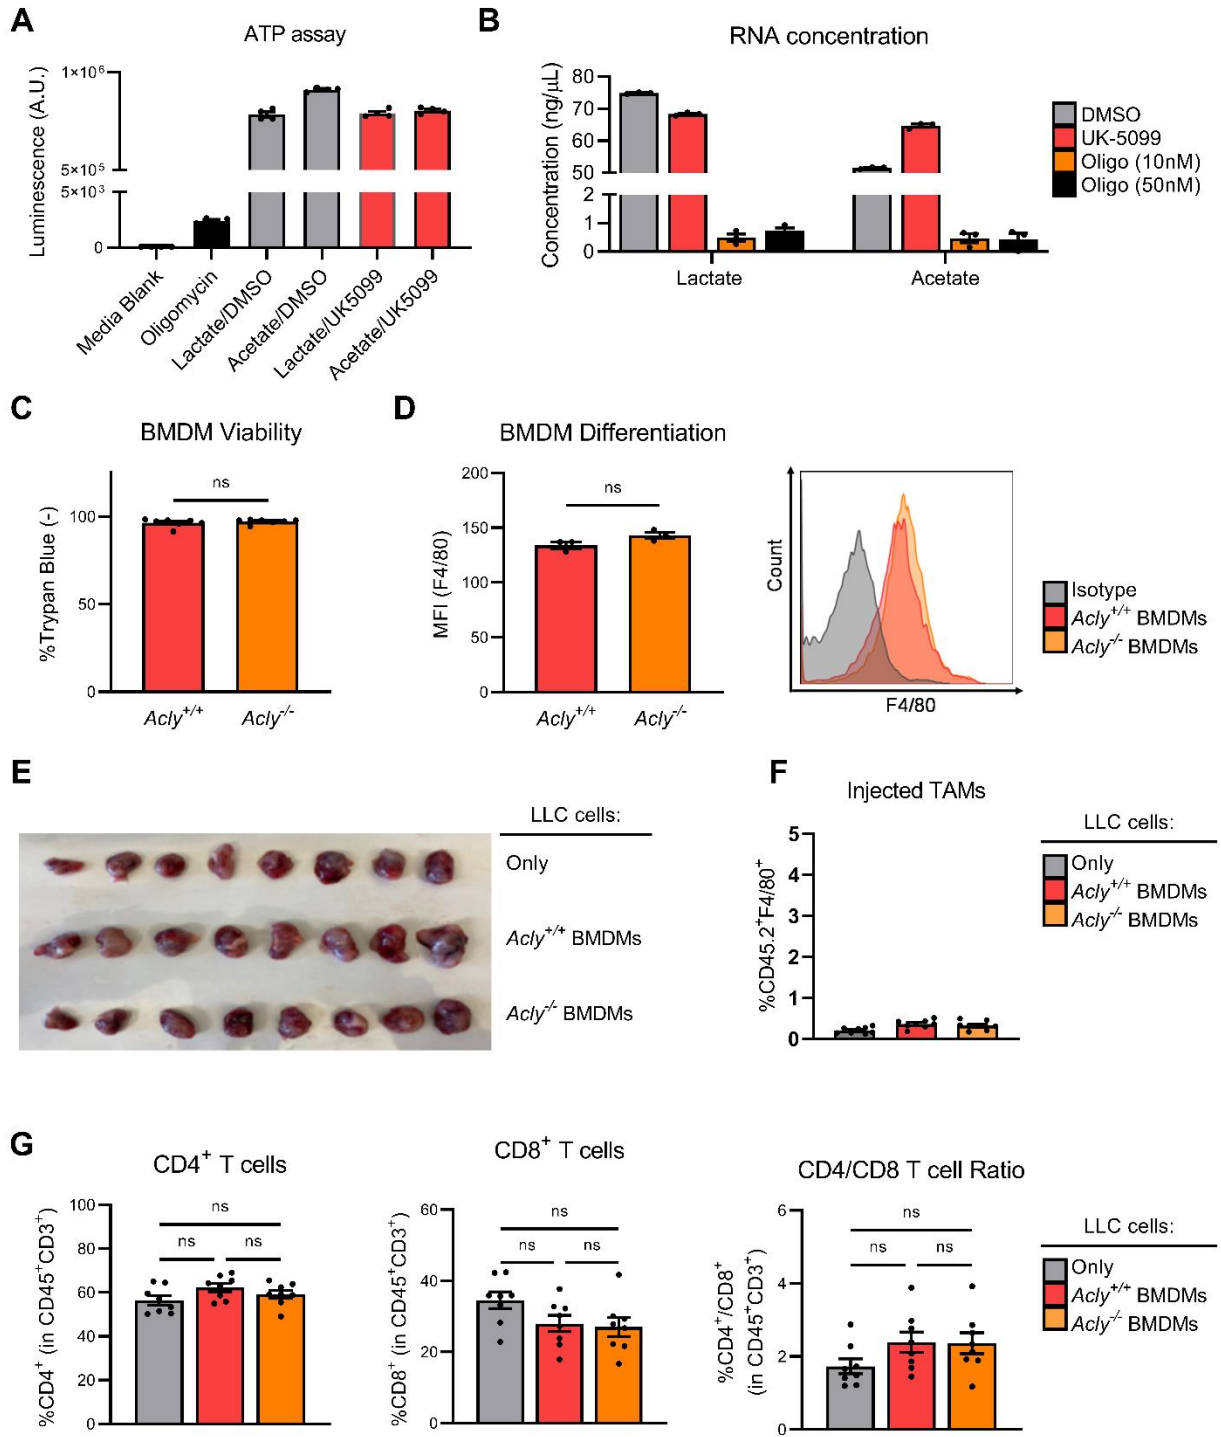

**Figure S4: ACLY-deficiency abrogates M2 macrophage polarization and tumor progression**

(A) ATP assay of BMDMs starved in GF media + 10% dFBS (4 hours) before pre-treatment  $\pm$  Oligomycin A (10 nM) or UK-5099 (25  $\mu$ M) and supplementation with lactate (10 mM) or acetate (10 mM) and then polarization  $\pm$  IL-4 (20 ng/mL) for twenty-four hours. (B) RNA concentration of BMDMs starved in GF media + 10% dFBS (4 hours) before pre-treatment  $\pm$  Oligomycin A (Oligo) or UK-5099 (25  $\mu$ M) and supplementation with lactate (10 mM) or acetate (10 mM) and



then polarization  $\pm$  IL-4 (20 ng/mL) for twenty-four hours **(C)** Viability and **(D)** F4/80 expression in *Acly*<sup>+/+</sup> and *Acly*<sup>-/-</sup> M0 BMDMs following differentiation. **(E)** Gross dissection of tumors from mice injected with LLC cells alone, LLC cells with M2 polarized *Acly*<sup>+/+</sup> BMDMs, or LLC cells with M2 polarized *Acly*<sup>-/-</sup> BMDMs. Flow cytometric analysis of **(F)** CD45.2<sup>+</sup> TAMs and **(G, left)** CD4<sup>+</sup> T cells, **(G, middle)** CD8<sup>+</sup> T cells and **(G, right)** CD4<sup>+</sup>/CD8<sup>+</sup> T cell ratio of the respective tumors at endpoint. Data are shown as mean  $\pm$  SEM of three (A, B), seven (C, D), and eight (E-G) replicates. \* $p \leq 0.05$ , \*\* $p \leq 0.01$ , \*\*\* $p \leq 0.001$  by student's t test (C, D), or one-way ANOVA (F, G) with Tukey's post-test. Photo Credit: Jordan Noe, University of Louisville.
